# Supplementary material for: Neuroanatomical Quantitative Proteomics Reveals Common Pathogenic Biological Routes between Amyotrophic Lateral Sclerosis (ALS) and Frontotemporal Dementia (FTD)
Source: PubMed Central journal article supplement (PMC6337647; doi:10.3390/ijms20010004), 2018-12-20
Supplement: ijms-20-00004-s001.pdf [file ijms-20-00004-s001.pdf]

**Supplementary Table S1: In this table protein name, uniprot code, gene name p-value and Fold change (FC) for each comparison are shown, for 299 of the 301 significantly regulated proteins found in both comparisons (p-value<0.01, fold change (FC) >+/-0.37) ALS versus control and FTLD-U versus control. Two uncharacterized proteins have been excluded from this list**

| Protein name                                                         | Uniprot    | Gene name | p value FTLD-U | FC FTLD-U  | p value ALS | FC ALS     |
|----------------------------------------------------------------------|------------|-----------|----------------|------------|-------------|------------|
| Cytochrome b-c1 complex subunit 7                                    | P14927     | UQCRB     | 1.534E-03      | -1.591E+00 | 6.005E-04   | -1.639E+00 |
| NADH dehydrogenase [ubiquinone] 1 alpha subcomplex subunit 7         | O95182     | NDUFA7    | 4.127E-04      | -9.471E-01 | 3.467E-05   | -1.643E+00 |
| NADH dehydrogenase [ubiquinone] 1 alpha subcomplex subunit 2         | O43678     | NDUFA2    | 3.230E-04      | -9.145E-01 | 2.113E-04   | -1.450E+00 |
| NADH dehydrogenase [ubiquinone] iron-sulfur protein 5                | O43920     | NDUFS5    | 1.769E-04      | -8.829E-01 | 3.235E-05   | -1.007E+00 |
| ARF GTPase-activating protein GIT1                                   | A0A0C4DGN6 | GIT1      | 1.306E-03      | -8.810E-01 | 1.115E-03   | -7.228E-01 |
| Methylglutaconyl-CoA hydratase, mitochondrial                        | Q13825     | AUH       | 6.097E-04      | -7.666E-01 | 5.619E-06   | -1.178E+00 |
| ADP/ATP translocase 1                                                | P12235     | SLC25A4   | 6.068E-03      | -6.095E-01 | 3.595E-04   | -1.011E+00 |
| MIC                                                                  | J3QTA6     | CHCHD6    | 1.090E-04      | -5.913E-01 | 2.124E-03   | -5.948E-01 |
| MIC                                                                  | J3QTA6     | CHCHD6    | 1.090E-04      | -5.913E-01 | 2.124E-03   | -5.948E-01 |
| Protein kinase C and casein kinase substrate in neurons protein 1    | Q9BY11     | PACSIN1   | 3.837E-03      | -5.863E-01 | 3.680E-06   | -1.824E+00 |
| Tubulin polymerization-promoting protein                             | O94811     | TPPP      | 6.466E-03      | -5.755E-01 | 6.943E-06   | -1.169E+00 |
| MIC                                                                  | C9JRZ6     | CHCHD3    | 2.912E-02      | -6.187E-01 | 2.195E-03   | -9.781E-01 |
| Mitochondrial 2-oxoglutarate/malate carrier protein                  | Q02978     | SLC25A11  | 5.385E-03      | -5.642E-01 | 2.067E-04   | -6.783E-01 |
| NADH dehydrogenase [ubiquinone] iron-sulfur protein 6, mitochondrial | O75380     | NDUFS6    | 6.385E-04      | -5.636E-01 | 2.521E-04   | -1.344E+00 |
| ATP-dependent RNA helicase A                                         | Q08211     | DHX9      | 6.206E-03      | -5.489E-01 | 5.978E-04   | -7.282E-01 |
| Cytochrome b-c1 complex subunit 6, mitochondrial                     | P07919     | UQCRH     | 2.555E-03      | -5.462E-01 | 3.774E-05   | -1.112E+00 |
| ATP synthase subunit e, mitochondrial                                | P56385     | ATP5I     | 3.812E-03      | -4.960E-01 | 5.590E-03   | -7.127E-01 |
| D-tyrosyl-tRNA(Tyr) deacylase 1                                      | Q8TEA8     | DTD1      | 4.453E-03      | -4.480E-01 | 5.201E-04   | -6.216E-01 |

|                                                                                  |            |          |           |            |           |            |
|----------------------------------------------------------------------------------|------------|----------|-----------|------------|-----------|------------|
| <b>Isoform 2 of NADH dehydrogenase [ubiquinone] 1 alpha subcomplex subunit 5</b> | Q16718-2   | NDUFA5   | 8.172E-04 | -4.311E-01 | 3.914E-04 | -7.745E-01 |
| <b>Isoform 2 of Fructose-bisphosphate aldolase A</b>                             | P04075-2   | ALDOA    | 2.564E-03 | -4.256E-01 | 7.392E-03 | -6.171E-01 |
| <b>Peptidyl-prolyl cis-trans isomerase NIMA-interacting 1</b>                    | Q13526     | PIN1     | 1.130E-03 | -3.917E-01 | 9.565E-06 | -9.878E-01 |
| <b>Mitochondrial import inner membrane translocase subunit Tim13</b>             | Q9Y5L4     | TIMM13   | 1.759E-04 | -3.875E-01 | 2.658E-03 | -4.346E-01 |
| <b>14-3-3 protein eta</b>                                                        | Q04917     | YWHAH    | 4.999E-01 | -2.994E-01 | 5.756E-03 | -1.635E+00 |
| <b>26S protease regulatory subunit 10B</b>                                       | A0A087X2I1 | PSMC6    | 5.644E-01 | 1.464E-01  | 2.276E-03 | -8.141E-01 |
| <b>3-hydroxyacyl-CoA dehydrogenase type-2</b>                                    | Q99714     | HSD17B10 | 5.735E-01 | -7.288E-02 | 1.485E-04 | -6.069E-01 |
| <b>3-ketoacyl-CoA thiolase, mitochondrial</b>                                    | A0A0B4J2A4 | ACAA2    | 1.972E-01 | -1.698E-01 | 4.707E-04 | -5.742E-01 |
| <b>A-kinase anchor protein 12</b>                                                | Q02952     | AKAP12   | 3.603E-01 | -9.134E-02 | 1.614E-03 | -4.658E-01 |
| <b>ATP synthase F(0) complex subunit B1, mitochondrial</b>                       | P24539     | ATP5F1   | 2.646E-02 | -5.400E-01 | 2.014E-04 | -1.195E+00 |
| <b>ATP synthase subunit O, mitochondrial</b>                                     | P48047     | ATP5O    | 2.770E-02 | -3.439E-01 | 1.684E-05 | -9.332E-01 |
| <b>ATP synthase subunit alpha, mitochondrial</b>                                 | P25705     | ATP5A1   | 3.394E-01 | -1.653E-01 | 3.065E-03 | -6.564E-01 |
| <b>ATP synthase subunit epsilon, mitochondrial</b>                               | P56381     | ATP5E    | 2.914E-02 | -3.728E-01 | 1.281E-03 | -8.244E-01 |
| <b>Alpha-internexin</b>                                                          | Q16352     | INA      | 5.864E-01 | -1.547E-01 | 8.300E-03 | -9.529E-01 |
| <b>Ankyrin-2</b>                                                                 | I6L894     | ANK2     | 4.074E-01 | -2.006E-01 | 1.965E-01 | 3.564E-01  |
| <b>Ankyrin-2</b>                                                                 | Q01484     | ANK2     | 1.885E-01 | -3.857E-01 | 7.451E-03 | -7.517E-01 |
| <b>Aspartate aminotransferase, cytoplasmic</b>                                   | P17174     | GOT1     | 1.663E-01 | -2.206E-01 | 3.226E-04 | -8.068E-01 |
| <b>Aspartate aminotransferase, mitochondrial</b>                                 | P00505     | GOT2     | 9.215E-02 | -4.124E-01 | 3.229E-03 | -8.777E-01 |
| <b>Beta-adducin</b>                                                              | P35612     | ADD2     | 9.875E-01 | -2.137E-03 | 3.014E-03 | -4.535E-01 |
| <b>Beta-synuclein</b>                                                            | Q16143     | SNCB     | 7.097E-01 | -7.728E-02 | 8.855E-04 | -9.587E-01 |
| <b>Brain acid soluble protein 1</b>                                              | P80723     | BASP1    | 5.027E-01 | -3.308E-01 | 2.776E-05 | -2.879E+00 |
| <b>CAP-Gly domain-containing linker protein 2</b>                                | Q9UDT6     | CLIP2    | 2.721E-01 | 1.044E-01  | 3.807E-03 | -3.988E-01 |
| <b>CLIP-associating protein 2</b>                                                | E7EW49     | CLASP2   | 8.832E-02 | 2.676E-01  | 1.164E-04 | -6.969E-01 |
| <b>Calcium/calmodulin-dependent protein kinase type II subunit beta</b>          | Q13554     | CAMK2B   | 6.042E-01 | -1.136E-01 | 2.690E-04 | -1.095E+00 |
| <b>Calcyclin-binding protein</b>                                                 | Q9HB71     | CACYBP   | 9.103E-02 | -1.277E-01 | 6.298E-05 | -4.090E-01 |
| <b>Clathrin light chain B</b>                                                    | P09497     | CLTB     | 1.425E-02 | -3.531E-01 | 9.393E-05 | -7.432E-01 |
| <b>Collagen alpha-2(IV) chain</b>                                                | P08572     | COL4A2   | 3.343E-02 | -6.581E-01 | 5.603E-03 | -9.356E-01 |

|                                                                                                                 |            |         |           |            |           |            |
|-----------------------------------------------------------------------------------------------------------------|------------|---------|-----------|------------|-----------|------------|
| <b>Creatine kinase U-type, mitochondrial</b>                                                                    | P12532     | CKMT1A  | 5.027E-01 | -1.007E-01 | 1.093E-06 | -9.984E-01 |
| <b>Crk-like protein</b>                                                                                         | P46109     | CRKL    | 1.811E-01 | -1.899E-01 | 1.996E-04 | -6.290E-01 |
| <b>Cyclin-dependent-like kinase 5</b>                                                                           | Q00535     | CDK5    | 4.768E-01 | -9.335E-02 | 7.319E-03 | -5.475E-01 |
| <b>Cystatin-C</b>                                                                                               | P01034     | CST3    | 1.337E-01 | -3.599E-01 | 6.755E-03 | -6.734E-01 |
| <b>Cysteine and histidine-rich domain-containing protein 1</b>                                                  | Q9UHD1     | CHORDC1 | 2.767E-01 | -1.879E-01 | 3.906E-03 | -6.403E-01 |
| <b>Cytochrome b-c1 complex subunit 1, mitochondrial</b>                                                         | P31930     | UQCRC1  | 2.439E-02 | -2.676E-01 | 1.033E-03 | -5.904E-01 |
| <b>Cytochrome b-c1 complex subunit 2, mitochondrial</b>                                                         | P22695     | UQCRC2  | 8.842E-01 | 3.131E-02  | 2.903E-04 | -1.011E+00 |
| <b>Cytochrome c oxidase subunit 5A, mitochondrial</b>                                                           | P20674     | COX5A   | 1.070E-01 | -2.671E-01 | 4.390E-05 | -1.232E+00 |
| <b>Cytochrome c oxidase subunit 5B, mitochondrial</b>                                                           | P10606     | COX5B   | 3.017E-02 | -5.270E-01 | 2.304E-04 | -1.864E+00 |
| <b>Cytochrome c oxidase subunit 6A1, mitochondrial</b>                                                          | P12074     | COX6A1  | 6.820E-01 | -1.015E-01 | 1.479E-04 | -1.462E+00 |
| <b>Cytochrome c oxidase subunit 6B1</b>                                                                         | P14854     | COX6B1  | 4.828E-02 | -3.545E-01 | 2.623E-05 | -9.959E-01 |
| <b>Dihydrolipoyl dehydrogenase, mitochondrial</b>                                                               | P09622     | DLD     | 2.040E-01 | -1.761E-01 | 1.535E-03 | -5.779E-01 |
| <b>Dihydrolipoyllysine-residue acetyltransferase component of pyruvate dehydrogenase complex, mitochondrial</b> | P10515     | DLAT    | 9.583E-01 | 1.003E-02  | 2.903E-03 | -5.745E-01 |
| <b>Drebrin</b>                                                                                                  | Q16643     | DBN1    | 1.708E-01 | -3.295E-01 | 1.635E-03 | -8.918E-01 |
| <b>Elongation factor 1-alpha 2</b>                                                                              | Q05639     | EEF1A2  | 5.839E-02 | -7.670E-01 | 1.248E-03 | -1.765E+00 |
| <b>Endophilin-A3</b>                                                                                            | Q99963     | SH3GL3  | 7.411E-01 | 5.451E-02  | 5.477E-04 | -8.744E-01 |
| <b>Eukaryotic translation initiation factor 5A-1</b>                                                            | I3L504     | EIF5A   | 7.102E-01 | -5.812E-02 | 1.125E-04 | -1.150E+00 |
| <b>Fatty acid-binding protein, heart (Fragment)</b>                                                             | S4R371     | FABP3   | 1.889E-02 | -3.356E-01 | 1.435E-03 | -7.746E-01 |
| <b>Fructose-bisphosphate aldolase C</b>                                                                         | P09972     | ALDOC   | 3.917E-01 | -1.088E-01 | 5.564E-05 | -7.127E-01 |
| <b>Fumarate hydratase, mitochondrial</b>                                                                        | P07954     | FH      | 3.974E-01 | -1.306E-01 | 8.325E-04 | -5.567E-01 |
| <b>Gamma-enolase</b>                                                                                            | P09104     | ENO2    | 7.987E-02 | -1.478E-01 | 5.903E-04 | -5.851E-01 |
| <b>Gamma-soluble NSF attachment protein</b>                                                                     | Q99747     | NAPG    | 7.597E-02 | -1.588E-01 | 2.599E-04 | -5.203E-01 |
| <b>Gamma-synuclein</b>                                                                                          | O76070     | SNCG    | 2.869E-01 | -1.793E-01 | 8.657E-05 | -7.801E-01 |
| <b>Glucose-6-phosphate isomerase (Fragment)</b>                                                                 | A0A0A0MTS2 | GPI     | 3.983E-01 | -1.014E-01 | 2.509E-03 | -4.165E-01 |
| <b>Glutathione S-transferase kappa 1</b>                                                                        | Q9Y2Q3     | GSTK1   | 9.588E-01 | 1.509E-02  | 5.204E-03 | -1.161E+00 |

|                                                                                      |          |         |           |            |           |            |
|--------------------------------------------------------------------------------------|----------|---------|-----------|------------|-----------|------------|
| <b>HIG1 domain family member 1A, mitochondrial</b>                                   | C9JNU6   | HIGD1A  | 3.272E-01 | -2.261E-01 | 4.101E-04 | -1.001E+00 |
| <b>Heterogeneous nuclear ribonucleoprotein M</b>                                     | P52272   | HNRNPM  | 7.168E-01 | -1.616E-02 | 1.937E-04 | -4.287E-01 |
| <b>Hyaluronan and proteoglycan link protein 2</b>                                    | Q9GZV7   | HAPLN2  | 9.009E-02 | -5.195E-01 | 4.286E-05 | -1.562E+00 |
| <b>Hypoxanthine-guanine phosphoribosyltransferase</b>                                | P00492   | HPRT1   | 6.308E-01 | -7.132E-02 | 3.900E-03 | -5.122E-01 |
| <b>Immunoglobulin superfamily member 8</b>                                           | Q969P0   | IGSF8   | 6.157E-02 | -2.599E-01 | 3.015E-04 | -7.467E-01 |
| <b>Interferon-inducible double-stranded RNA-dependent protein kinase activator A</b> | O75569   | PRKRA   | 4.241E-02 | -4.771E-01 | 4.848E-04 | -1.147E+00 |
| <b>Isoaspartyl peptidase/L-asparaginase</b>                                          | Q7L266   | ASRGL1  | 8.671E-01 | -2.464E-02 | 7.620E-03 | -5.145E-01 |
| <b>Isoform 2 of Cytoplasmic dynein 1 intermediate chain 1</b>                        | O14576-2 | DYNC1I1 | 2.327E-02 | -8.297E-01 | 5.765E-04 | -1.651E+00 |
| <b>Isoform 2 of MIC</b>                                                              | Q16891-2 | IMMT    | 2.545E-01 | -1.080E-01 | 3.325E-05 | -4.886E-01 |
| <b>Isoform 2 of NADH dehydrogenase [ubiquinone] 1 beta subcomplex subunit 4</b>      | O95168-2 | NDUFB4  | 1.728E-02 | -4.495E-01 | 1.082E-06 | -2.206E+00 |
| <b>Isoform 2 of Serine/arginine-rich splicing factor 2</b>                           | Q01130-2 | SRSF2   | 4.255E-01 | -1.399E-01 | 2.264E-03 | -6.406E-01 |
| <b>Isoform 3 of Neurochondrin</b>                                                    | Q9UBB6-3 | NCDN    | 8.974E-01 | -3.598E-02 | 1.296E-03 | -1.165E+00 |
| <b>Isoform 4 of Clathrin coat assembly protein AP180</b>                             | O60641-4 | SNAP91  | 5.556E-02 | -3.402E-01 | 8.500E-03 | -5.470E-01 |
| <b>Isoform 5 of Actin-binding LIM protein 2</b>                                      | Q6H8Q1-5 | ABLIM2  | 2.073E-01 | -3.341E-01 | 4.047E-03 | -1.110E+00 |
| <b>Isoform 7 of Cytosolic acyl coenzyme A thioester hydrolase</b>                    | O00154-7 | ACOT7   | 8.427E-01 | -3.136E-02 | 1.739E-06 | -1.556E+00 |
| <b>Isoform 9 of Calpastatin</b>                                                      | P20810-9 | CAST    | 4.090E-01 | -1.721E-01 | 3.625E-03 | -1.020E+00 |
| <b>Leucine-rich repeat-containing protein 47</b>                                     | Q8N1G4   | LRRC47  | 3.200E-02 | -3.239E-01 | 1.376E-04 | -7.923E-01 |
| <b>MAP6 domain-containing protein 1</b>                                              | Q9H9H5   | MAP6D1  | 3.703E-01 | -2.553E-01 | 1.834E-04 | -1.477E+00 |
| <b>ATP synthase subunit d, mitochondrial</b>                                         | O75947   | ATP5H   | 3.103E-03 | -3.821E-01 | 4.434E-04 | -5.497E-01 |
| <b>MIC</b>                                                                           | C9JRZ6   | CHCHD3  | 2.912E-02 | -6.187E-01 | 2.195E-03 | -9.781E-01 |
| <b>Macrophage migration inhibitory factor</b>                                        | P14174   | MIF     | 6.514E-02 | -5.958E-01 | 7.627E-03 | -8.703E-01 |
| <b>Malate dehydrogenase, cytoplasmic</b>                                             | P40925   | MDH1    | 7.469E-01 | -3.783E-02 | 6.571E-05 | -6.417E-01 |
| <b>Malate dehydrogenase, mitochondrial</b>                                           | P40926   | MDH2    | 2.991E-02 | -3.994E-01 | 1.317E-04 | -7.848E-01 |

|                                                                                 |        |               |           |            |           |            |
|---------------------------------------------------------------------------------|--------|---------------|-----------|------------|-----------|------------|
| Microtubule-associated protein                                                  | F8W9U4 | MAP4          | 2.742E-01 | -2.519E-01 | 4.201E-03 | -9.554E-01 |
| Microtubule-associated protein                                                  | E7EVA0 | MAP4          | 3.660E-01 | 2.141E-01  | 9.383E-01 | -1.732E-02 |
| Microtubule-associated protein 2                                                | P11137 | MAP2          | 1.979E-01 | -4.528E-01 | 3.386E-03 | -1.073E+00 |
| Microtubule-associated protein 6                                                | Q96JE9 | MAP6          | 4.823E-02 | -3.578E-01 | 2.345E-05 | -1.030E+00 |
| Microtubule-associated protein RP/EB family member 3                            | Q9UPY8 | MAPRE3        | 3.929E-01 | 3.012E-01  | 6.312E-03 | -9.822E-01 |
| NADH dehydrogenase [ubiquinone] 1 alpha subcomplex subunit 12                   | Q9UI09 | NDUFA12       | 2.913E-02 | -5.674E-01 | 9.288E-05 | -1.234E+00 |
| NADH dehydrogenase [ubiquinone] 1 alpha subcomplex subunit 8                    | P51970 | NDUFA8        | 1.421E-02 | -3.793E-01 | 6.289E-06 | -1.326E+00 |
| NADH dehydrogenase [ubiquinone] 1 beta subcomplex subunit 10                    | O96000 | NDUFB10       | 2.358E-01 | -3.283E-01 | 1.565E-05 | -1.509E+00 |
| NADH dehydrogenase [ubiquinone] flavoprotein 1, mitochondrial                   | P49821 | NDUFV1        | 5.881E-01 | -8.649E-02 | 1.324E-04 | -7.454E-01 |
| NADH dehydrogenase [ubiquinone] flavoprotein 2, mitochondrial                   | E7EPT4 | NDUFV2        | 5.104E-01 | -1.519E-01 | 1.537E-03 | -8.857E-01 |
| NADH dehydrogenase [ubiquinone] iron-sulfur protein 4, mitochondrial            | O43181 | NDUFS4        | 1.802E-02 | -3.694E-01 | 8.070E-05 | -8.718E-01 |
| NADH dehydrogenase [ubiquinone] iron-sulfur protein 8, mitochondrial (Fragment) | E9PPW7 | NDUFS8        | 3.770E-01 | -8.931E-02 | 5.099E-04 | -5.568E-01 |
| Neurocan core protein                                                           | O14594 | NCAN          | 1.309E-02 | -8.803E-01 | 1.447E-04 | -1.486E+00 |
| Neurofilament heavy polypeptide                                                 | P12036 | NEFH          | 1.196E-01 | -3.025E-01 | 1.775E-05 | -9.741E-01 |
| Neurofilament medium polypeptide                                                | P07197 | NEFM          | 6.672E-01 | -6.913E-02 | 2.338E-04 | -7.075E-01 |
| Neuromodulin                                                                    | P17677 | GAP43         | 3.075E-01 | -2.426E-01 | 1.025E-04 | -9.534E-01 |
| Neuronal-specific septin-3                                                      | Q9UH03 | SEPT3         | 4.716E-01 | -1.387E-01 | 3.748E-03 | -7.117E-01 |
| Neuroplastin (Fragment)                                                         | Q9UFM8 | DKFZp566H1924 | 2.161E-02 | -3.327E-01 | 1.408E-05 | -9.384E-01 |
| Nuclear ubiquitous casein and cyclin-dependent kinase substrate 1               | Q9H1E3 | NUCKS1        | 7.015E-01 | -6.005E-02 | 6.802E-03 | -4.669E-01 |
| Oligodendrocyte-myelin glycoprotein                                             | P23515 | OMG           | 3.570E-01 | -1.732E-01 | 3.424E-04 | -8.362E-01 |
| Optineurin                                                                      | Q96CV9 | OPTN          | 1.092E-01 | -3.232E-01 | 1.109E-03 | -1.029E+00 |

|                                                                           |            |              |           |            |           |            |
|---------------------------------------------------------------------------|------------|--------------|-----------|------------|-----------|------------|
| <b>Phosphoglycolate phosphatase</b>                                       | A6NDG6     | PGP          | 4.097E-01 | -2.554E-01 | 5.051E-03 | -1.002E+00 |
| <b>Prefoldin subunit 6</b>                                                | O15212     | PFDN6        | 7.431E-01 | -4.929E-02 | 1.418E-03 | -6.448E-01 |
| <b>ProSAAS</b>                                                            | Q9UHG2     | PCSK1N       | 6.737E-02 | -6.322E-01 | 1.901E-03 | -1.064E+00 |
| <b>Programmed cell death protein 5</b>                                    | O14737     | PDCD5        | 3.410E-01 | -1.761E-01 | 6.664E-03 | -6.407E-01 |
| <b>Protein LOC102724023</b>                                               | A0A0B4J2D5 | LOC102724023 | 3.695E-01 | -6.843E-02 | 3.063E-05 | -5.687E-01 |
| <b>Pyruvate dehydrogenase E1 component subunit beta, mitochondrial</b>    | P11177     | PDHB         | 6.757E-02 | -1.706E-01 | 7.389E-03 | -4.145E-01 |
| <b>RNA 3'-terminal phosphate cyclase</b>                                  | O00442     | RTCA         | 3.665E-02 | -5.012E-01 | 2.122E-04 | -1.169E+00 |
| <b>RNA-binding motif protein, X chromosome</b>                            | P38159     | RBMX         | 1.566E-01 | -2.390E-01 | 1.607E-03 | -9.004E-01 |
| <b>Rho-related GTP-binding protein RhoB</b>                               | P62745     | RHOB         | 4.483E-01 | -1.326E-01 | 5.848E-03 | -4.404E-01 |
| <b>Secretogranin-2</b>                                                    | P13521     | SCG2         | 2.260E-01 | -5.114E-01 | 1.679E-03 | -1.429E+00 |
| <b>Serine/arginine-rich-splicing factor 1</b>                             | J3KTL2     | SRSF1        | 4.779E-01 | -1.139E-01 | 6.035E-03 | -7.222E-01 |
| <b>Sideroflexin-1</b>                                                     | Q9H9B4     | SFXN1        | 5.254E-01 | -1.230E-01 | 7.542E-03 | -6.787E-01 |
| <b>Signal recognition particle 14 kDa protein</b>                         | P37108     | SRP14        | 9.445E-01 | 2.428E-02  | 3.302E-03 | -1.369E+00 |
| <b>Signal transducing adapter molecule 1</b>                              | Q92783     | STAM         | 5.392E-02 | -2.783E-01 | 1.914E-04 | -6.827E-01 |
| <b>Single-stranded DNA-binding protein, mitochondrial</b>                 | Q04837     | SSBP1        | 1.199E-01 | -2.661E-01 | 5.965E-04 | -6.677E-01 |
| <b>Sodium/potassium-transporting ATPase subunit alpha-1</b>               | P05023     | ATP1A1       | 9.025E-01 | -2.696E-02 | 3.986E-03 | -8.406E-01 |
| <b>Stress-induced-phosphoprotein 1</b>                                    | P31948     | STIP1        | 5.129E-01 | -1.074E-01 | 1.136E-03 | -9.343E-01 |
| <b>Succinyl-CoA ligase [ADP/GDP-forming] subunit alpha, mitochondrial</b> | P53597     | SUCLG1       | 3.780E-01 | -1.889E-01 | 3.729E-03 | -6.037E-01 |
| <b>Synapsin-1</b>                                                         | P17600     | SYN1         | 9.636E-02 | -5.644E-01 | 4.555E-06 | -1.748E+00 |
| <b>Synapsin-2</b>                                                         | A0A087WW96 | SYN2         | 8.219E-01 | 9.930E-02  | 3.351E-03 | -1.330E+00 |
| <b>Synaptic vesicle membrane protein VAT-1 homolog-like</b>               | Q9HCJ6     | VAT1L        | 6.359E-01 | -7.890E-02 | 2.520E-04 | -8.243E-01 |
| <b>Syntaxin-12 (Fragment)</b>                                             | B1AJQ6     | STX12        | 9.274E-03 | -2.769E-01 | 1.068E-04 | -7.555E-01 |
| <b>Tensin-1</b>                                                           | Q9HBL0     | TNS1         | 1.779E-01 | -2.266E-01 | 7.246E-03 | -8.281E-01 |
| <b>Tetratricopeptide repeat protein 1</b>                                 | Q99614     | TTC1         | 1.771E-01 | 2.199E-01  | 1.972E-03 | -6.709E-01 |
| <b>Thy-1 membrane glycoprotein (Fragment)</b>                             | E9PNQ8     | THY1         | 3.737E-01 | -1.813E-01 | 3.449E-03 | -6.902E-01 |
| <b>Toll-interacting protein</b>                                           | Q9H0E2     | TOLLIP       | 5.249E-02 | -3.263E-01 | 5.378E-07 | -1.067E+00 |

|                                                                          |            |          |           |            |           |            |
|--------------------------------------------------------------------------|------------|----------|-----------|------------|-----------|------------|
| <b>Transcriptional activator protein Pur-alpha</b>                       | Q00577     | PURA     | 6.072E-01 | -5.882E-02 | 6.402E-05 | -6.753E-01 |
| <b>Triosephosphate isomerase</b>                                         | P60174     | TPI1     | 7.752E-01 | -3.350E-02 | 3.761E-03 | -4.265E-01 |
| <b>Tubulin alpha-4A chain</b>                                            | P68366     | TUBA4A   | 1.074E-01 | -4.295E-01 | 9.106E-05 | -1.200E+00 |
| <b>Ubiquitin carboxyl-terminal hydrolase isozyme L1</b>                  | P09936     | UCHL1    | 1.749E-01 | -1.295E-01 | 3.159E-06 | -7.171E-01 |
| <b>V-type proton ATPase subunit B, brain isoform</b>                     | P21281     | ATP6V1B2 | 2.509E-01 | -1.341E-01 | 2.944E-03 | -4.570E-01 |
| <b>V-type proton ATPase subunit G 2</b>                                  | O95670     | ATP6V1G2 | 4.878E-02 | -3.656E-01 | 1.212E-03 | -7.603E-01 |
| <b>Vesicle-associated membrane protein-associated protein B/C</b>        | O95292     | VAPB     | 1.291E-01 | -2.739E-01 | 7.900E-03 | -5.971E-01 |
| <b>Visinin-like protein 1</b>                                            | P62760     | VSNL1    | 2.632E-01 | 1.893E-01  | 8.827E-03 | -5.201E-01 |
| <b>Voltage-dependent anion-selective channel protein 1</b>               | P21796     | VDAC1    | 8.931E-02 | -1.959E-01 | 8.184E-04 | -4.582E-01 |
| <b>Voltage-dependent anion-selective channel protein 2</b>               | P45880     | VDAC2    | 5.764E-01 | 8.214E-02  | 3.681E-03 | -5.328E-01 |
| <b>10 kDa heat shock protein, mitochondrial</b>                          | P61604     | HSPE1    | 2.193E-03 | -4.621E-01 | 1.186E-02 | -6.116E-01 |
| <b>2-oxoglutarate dehydrogenase, mitochondrial</b>                       | E9PDF2     | OGDH     | 2.176E-04 | -8.500E-01 | 2.008E-01 | -2.373E-01 |
| <b>40S ribosomal protein S25</b>                                         | P62851     | RPS25    | 6.343E-03 | -7.300E-01 | 4.216E-01 | -1.724E-01 |
| <b>ADP/ATP translocase 3</b>                                             | P12236     | SLC25A6  | 8.759E-04 | -1.390E+00 | 3.015E-02 | -8.372E-01 |
| <b>Charged multivesicular body protein 5</b>                             | Q9NZZ3     | CHMP5    | 5.335E-03 | -6.306E-01 | 1.737E-01 | -3.960E-01 |
| <b>Disco-interacting protein 2 homolog B</b>                             | Q9P265     | DIP2B    | 4.880E-03 | -4.825E-01 | 1.350E-02 | -4.604E-01 |
| <b>Fructose-bisphosphate aldolase</b>                                    | J3KPS3     | ALDOA    | 3.840E-03 | -3.891E-01 | 9.201E-01 | -2.069E-02 |
| <b>Isoform 4 of Serine protease HTRA2, mitochondrial</b>                 | O43464-4   | HTRA2    | 2.254E-03 | -7.012E-01 | 1.171E-01 | -3.394E-01 |
| <b>Liprin-alpha-1</b>                                                    | Q13136     | PPFIA1   | 3.818E-03 | -1.001E+00 | 1.730E-01 | -4.482E-01 |
| <b>Peroxiredoxin-5, mitochondrial</b>                                    | P30044     | PRDX5    | 7.279E-04 | -3.912E-01 | 5.108E-02 | -3.232E-01 |
| <b>Phosphatidylinositol transfer protein beta isoform</b>                | A0A0A0MSW4 | PITPNB   | 6.055E-04 | -1.162E+00 | 5.537E-01 | -1.932E-01 |
| <b>Tight junction protein 1 (Zona occludens 1), isoform CRA_a</b>        | G3V1L9     | TJP1     | 3.230E-04 | -3.909E-01 | 3.990E-01 | 9.688E-02  |
| <b>1-phosphatidylinositol 4,5-bisphosphate phosphodiesterase delta-3</b> | Q8N3E9     | PLCD3    | 8.400E-03 | 4.528E-01  | 1.206E-01 | 5.074E-01  |
| <b>Amino acid transporter</b>                                            | A0A087WT87 | SLC1A3   | 3.972E-03 | 1.656E+00  | 6.655E-02 | 1.194E+00  |
| <b>Annexin A7</b>                                                        | P20073     | ANXA7    | 5.272E-03 | 1.620E+00  | 4.532E-01 | 3.957E-01  |
| <b>Nucleobindin-1</b>                                                    | Q02818     | NUCB1    | 2.175E-03 | 1.041E+00  | 1.304E-02 | 1.227E+00  |

|                                                            |            |          |           |            |           |            |
|------------------------------------------------------------|------------|----------|-----------|------------|-----------|------------|
| <b>Peptidyl-prolyl cis-trans isomerase-like 1</b>          | Q9Y3C6     | PPIL1    | 1.882E-03 | 4.966E-01  | 4.869E-01 | -1.807E-01 |
| <b>Proteasome subunit alpha type-7</b>                     | O14818     | PSMA7    | 4.769E-03 | 6.311E-01  | 7.594E-02 | 3.148E-01  |
| <b>S-formylglutathione hydrolase</b>                       | P10768     | ESD      | 6.331E-03 | 5.408E-01  | 2.182E-02 | 6.010E-01  |
| <b>Switch-associated protein 70</b>                        | E7EMB1     | SWAP70   | 3.323E-03 | 4.002E-01  | 8.472E-01 | 4.483E-02  |
| <b>2,4-dienoyl-CoA reductase, mitochondrial (Fragment)</b> | E5RFV2     | DECR1    | 8.119E-01 | -8.238E-02 | 2.733E-04 | 1.784E+00  |
| <b>26S proteasome non-ATPase regulatory subunit 2</b>      | Q13200     | PSMD2    | 8.714E-02 | -3.109E-01 | 4.078E-03 | 1.017E+00  |
| <b>4-trimethylaminobutyraldehyde dehydrogenase</b>         | P49189     | ALDH9A1  | 9.777E-02 | 2.549E-01  | 1.163E-04 | 8.329E-01  |
| <b>40S ribosomal protein S14</b>                           | P62263     | RPS14    | 3.967E-02 | 3.874E-01  | 1.547E-04 | 9.716E-01  |
| <b>6-phosphogluconate dehydrogenase, decarboxylating</b>   | P52209     | PGD      | 7.831E-01 | -5.604E-02 | 3.357E-04 | 1.281E+00  |
| <b>ATP-dependent RNA helicase DDX19A</b>                   | F6QDS0     | DDX19A   | 1.198E-01 | -4.580E-01 | 5.408E-03 | 1.023E+00  |
| <b>Acid ceramidase</b>                                     | E7EMM4     | ASAH1    | 1.167E-02 | 7.419E-01  | 2.077E-05 | 1.630E+00  |
| <b>Actin-related protein 2/3 complex subunit 5</b>         | O15511     | ARPC5    | 1.620E-02 | 4.865E-01  | 4.024E-05 | 6.331E-01  |
| <b>Acylamino-acid-releasing enzyme (Fragment)</b>          | H7C393     | APEH     | 4.385E-01 | -1.474E-01 | 2.045E-03 | 5.897E-01  |
| <b>Adenylyl cyclase-associated protein 1</b>               | Q01518     | CAP1     | 2.630E-02 | 4.372E-01  | 6.176E-04 | 7.583E-01  |
| <b>Adseverin</b>                                           | Q9Y6U3     | SCIN     | 1.071E-02 | 5.156E-01  | 5.705E-04 | 8.284E-01  |
| <b>Aflatoxin B1 aldehyde reductase member 2 (Fragment)</b> | H3BLU7     | AKR7A2   | 1.460E-02 | 3.819E-01  | 7.476E-03 | 8.288E-01  |
| <b>Alpha-1-antitrypsin</b>                                 | A0A024R6I7 | SERPINA1 | 1.527E-01 | 9.143E-01  | 1.739E-03 | 1.759E+00  |
| <b>Alpha-1B-glycoprotein</b>                               | P04217     | A1BG     | 8.026E-01 | 8.562E-02  | 3.396E-03 | 1.167E+00  |
| <b>Alpha-aminoadipic semialdehyde dehydrogenase</b>        | P49419     | ALDH7A1  | 5.467E-01 | 8.011E-02  | 1.516E-03 | 4.537E-01  |
| <b>Alpha-crystallin B chain</b>                            | P02511     | CRYAB    | 3.870E-01 | 2.053E-01  | 3.905E-03 | 8.500E-01  |
| <b>Amine oxidase [flavin-containing] B</b>                 | P27338     | MAOB     | 1.609E-02 | 4.309E-01  | 1.558E-04 | 6.326E-01  |
| <b>Annexin A1</b>                                          | P04083     | ANXA1    | 4.497E-01 | 2.204E-01  | 2.711E-04 | 1.394E+00  |
| <b>Apolipoprotein A-I</b>                                  | P02647     | APOA1    | 4.637E-01 | 2.115E-01  | 2.970E-05 | 1.511E+00  |
| <b>Apolipoprotein A-II</b>                                 | V9GYM3     | APOA2    | 5.951E-01 | 1.570E-01  | 3.080E-03 | 1.216E+00  |
| <b>Apolipoprotein D</b>                                    | P05090     | APOD     | 1.437E-01 | 3.843E-01  | 9.257E-04 | 8.889E-01  |
| <b>Apolipoprotein E</b>                                    | P02649     | APOE     | 3.637E-01 | 1.311E-01  | 1.843E-04 | 7.054E-01  |
| <b>Apoptosis-inducing factor 1, mitochondrial</b>          | O95831     | AIFM1    | 4.023E-01 | 6.948E-02  | 9.616E-04 | 3.875E-01  |



|                                                                       |            |         |           |            |           |           |
|-----------------------------------------------------------------------|------------|---------|-----------|------------|-----------|-----------|
| <b>B-cell receptor-associated protein 31</b>                          | P51572     | BCAP31  | 1.545E-02 | 3.932E-01  | 5.116E-03 | 4.412E-01 |
| <b>Band 4.1-like protein 2</b>                                        | O43491     | EPB41L2 | 8.158E-01 | -7.887E-02 | 1.553E-03 | 1.424E+00 |
| <b>Cadherin-2</b>                                                     | P19022     | CDH2    | 3.278E-02 | 8.871E-01  | 1.046E-04 | 1.662E+00 |
| <b>Calcyphosin</b>                                                    | K7EL21     | CAPS    | 3.187E-01 | 3.625E-01  | 8.584E-04 | 1.525E+00 |
| <b>Calpain small subunit 1</b>                                        | A0A0C4DGQ5 | CAPNS1  | 1.642E-01 | 3.051E-01  | 4.284E-03 | 9.525E-01 |
| <b>Calponin-3</b>                                                     | Q15417     | CNN3    | 5.542E-01 | 3.522E-01  | 2.813E-03 | 1.578E+00 |
| <b>Catalase</b>                                                       | P04040     | CAT     | 1.427E-01 | 3.443E-01  | 2.329E-03 | 8.906E-01 |
| <b>Centrosomal protein of 170 kDa</b>                                 | Q5SW79     | CEP170  | 3.157E-01 | 1.124E-01  | 1.351E-04 | 5.897E-01 |
| <b>Ceruloplasmin</b>                                                  | P00450     | CP      | 5.680E-01 | 2.312E-01  | 4.775E-03 | 1.257E+00 |
| <b>Charged multivesicular body protein 4b</b>                         | Q9H444     | CHMP4B  | 9.944E-02 | 2.440E-01  | 1.780E-04 | 6.813E-01 |
| <b>Chloride intracellular channel protein 1</b>                       | O00299     | CLIC1   | 2.876E-01 | 2.553E-01  | 1.287E-04 | 1.276E+00 |
| <b>Copper chaperone for superoxide dismutase</b>                      | J3KNF4     | CCS     | 1.434E-01 | 3.309E-01  | 1.099E-03 | 8.716E-01 |
| <b>Coronin-1C</b>                                                     | Q9ULV4     | CORO1C  | 8.355E-01 | -5.384E-02 | 1.660E-03 | 1.153E+00 |
| <b>Cystatin-B</b>                                                     | P04080     | CSTB    | 5.769E-01 | 7.009E-02  | 7.087E-03 | 4.019E-01 |
| <b>Cytosol aminopeptidase</b>                                         | P28838     | LAP3    | 2.047E-01 | 1.843E-01  | 2.332E-03 | 4.730E-01 |
| <b>Cytosolic 10-formyltetrahydrofolate dehydrogenase</b>              | O75891     | ALDH1L1 | 3.026E-01 | 2.324E-01  | 4.156E-03 | 7.964E-01 |
| <b>D-3-phosphoglycerate dehydrogenase</b>                             | O43175     | PHGDH   | 7.928E-02 | 1.663E-01  | 1.391E-03 | 3.997E-01 |
| <b>Delta-aminolevulinic acid dehydratase</b>                          | P13716     | ALAD    | 6.364E-02 | 3.716E-01  | 3.834E-03 | 6.570E-01 |
| <b>Disintegrin and metalloproteinase domain-containing protein 10</b> | O14672     | ADAM10  | 1.419E-01 | 5.797E-01  | 6.233E-04 | 1.508E+00 |
| <b>DnaJ homolog subfamily A member 2</b>                              | O60884     | DNAJA2  | 8.592E-01 | 2.486E-02  | 2.608E-06 | 8.054E-01 |
| <b>DnaJ homolog subfamily B member 1</b>                              | P25685     | DNAJB1  | 7.885E-01 | -5.496E-02 | 3.351E-07 | 1.859E+00 |
| <b>Erythrocyte band 7 integral membrane protein</b>                   | P27105     | STOM    | 4.143E-02 | 5.612E-01  | 4.069E-04 | 1.212E+00 |
| <b>Estradiol 17-beta-dehydrogenase 8</b>                              | Q92506     | HSD17B8 | 4.165E-01 | -1.269E-01 | 1.534E-03 | 7.109E-01 |
| <b>Ethylmalonyl-CoA decarboxylase</b>                                 | Q9NTX5     | ECHDC1  | 2.755E-02 | 3.735E-01  | 7.784E-03 | 5.160E-01 |
| <b>Extracellular superoxide dismutase [Cu-Zn]</b>                     | P08294     | SOD3    | 4.850E-01 | 2.718E-01  | 5.033E-03 | 1.408E+00 |
| <b>F-box only protein 2</b>                                           | Q9UK22     | FBXO2   | 3.557E-01 | 2.114E-01  | 7.253E-03 | 1.240E+00 |
| <b>Flavin reductase (NADPH)</b>                                       | P30043     | BLVRB   | 7.125E-02 | 1.336E-01  | 6.874E-03 | 3.992E-01 |
| <b>Fumarylacetoacetase</b>                                            | P16930     | FAH     | 9.911E-01 | -3.176E-03 | 4.173E-03 | 8.653E-01 |

|                                                                           |            |        |           |            |           |           |
|---------------------------------------------------------------------------|------------|--------|-----------|------------|-----------|-----------|
| <b>Galectin-3</b>                                                         | P17931     | LGALS3 | 7.406E-01 | 5.522E-02  | 5.953E-03 | 5.208E-01 |
| <b>Glia maturation factor beta (Fragment)</b>                             | G3V4P8     | GMFB   | 7.137E-01 | -4.899E-02 | 3.788E-03 | 4.422E-01 |
| <b>Glutathione S-transferase Mu 2</b>                                     | P28161     | GSTM2  | 4.574E-01 | 1.232E-01  | 3.428E-03 | 8.850E-01 |
| <b>Glutathione S-transferase P</b>                                        | P09211     | GSTP1  | 4.543E-01 | 8.822E-02  | 9.080E-03 | 4.147E-01 |
| <b>Hemoglobin subunit alpha</b>                                           | P69905     | HBA1   | 6.410E-02 | 5.821E-01  | 1.716E-04 | 1.414E+00 |
| <b>Hemoglobin subunit beta</b>                                            | P68871     | HBB    | 4.832E-01 | 2.394E-01  | 8.632E-03 | 1.125E+00 |
| <b>Hemoglobin subunit delta</b>                                           | P02042     | HBD    | 3.504E-01 | 2.626E-01  | 5.235E-04 | 1.432E+00 |
| <b>Hemopexin</b>                                                          | P02790     | HPX    | 4.123E-01 | 3.227E-01  | 3.701E-03 | 1.383E+00 |
| <b>Histamine N-methyltransferase</b>                                      | P50135     | HNMT   | 8.305E-01 | 6.994E-02  | 5.375E-03 | 7.872E-01 |
| <b>Hsc70-interacting protein</b>                                          | P50502     | ST13   | 1.674E-01 | 1.855E-01  | 1.635E-03 | 5.079E-01 |
| <b>Hydroxyacyl-coenzyme A dehydrogenase, mitochondrial</b>                | A0A0A0MSE2 | HADH   | 9.286E-01 | 3.001E-02  | 4.720E-03 | 1.147E+00 |
| <b>Integrin alpha-6</b>                                                   | P23229     | ITGA6  | 2.150E-01 | 1.754E-01  | 5.429E-05 | 9.955E-01 |
| <b>Intercellular adhesion molecule 1</b>                                  | P05362     | ICAM1  | 8.858E-01 | 3.290E-02  | 3.708E-03 | 7.018E-01 |
| <b>Isoform 2 of 40S ribosomal protein S3</b>                              | P23396-2   | RPS3   | 1.420E-02 | 5.042E-01  | 5.916E-03 | 8.091E-01 |
| <b>Isoform 2 of Annexin A2</b>                                            | P07355-2   | ANXA2  | 3.407E-01 | 1.759E-01  | 7.923E-06 | 1.233E+00 |
| <b>Isoform 2 of Filamin-C</b>                                             | Q14315-2   | FLNC   | 2.036E-01 | 2.357E-01  | 1.444E-04 | 1.077E+00 |
| <b>Isoform 2 of N-acetyl-D-glucosamine kinase</b>                         | Q9UJ70-2   | NAGK   | 9.127E-01 | 2.350E-02  | 2.102E-03 | 7.846E-01 |
| <b>Isoform 2 of Sorcin</b>                                                | P30626-2   | SRI    | 3.527E-02 | 4.760E-01  | 5.071E-03 | 8.651E-01 |
| <b>Isoform 2 of Transgelin-2</b>                                          | P37802-2   | TAGLN2 | 3.297E-01 | 2.751E-01  | 2.507E-03 | 9.969E-01 |
| <b>Isoform 3 of Ankyrin-3</b>                                             | Q12955-5   | ANK3   | 5.593E-01 | 8.421E-02  | 7.390E-04 | 6.928E-01 |
| <b>Isoform 3 of Gamma-glutamyltransferase 5</b>                           | P36269-3   | GGT5   | 1.240E-01 | -4.468E-01 | 2.462E-03 | 9.958E-01 |
| <b>Isoform 4 of Integrin beta-1</b>                                       | P05556-4   | ITGB1  | 4.109E-01 | 1.129E-01  | 4.786E-06 | 9.852E-01 |
| <b>Isoform 4 of Non-specific lipid-transfer protein</b>                   | P22307-4   | SCP2   | 4.420E-01 | 9.641E-02  | 4.072E-03 | 5.398E-01 |
| <b>Isoform 4 of Plasminogen activator inhibitor 1 RNA-binding protein</b> | Q8NC51-4   | SERBP1 | 2.784E-02 | 6.295E-01  | 2.448E-03 | 1.015E+00 |
| <b>Isoform 5 of CD44 antigen</b>                                          | P16070-5   | CD44   | 2.838E-01 | 2.290E-01  | 9.365E-04 | 7.852E-01 |
| <b>Isoform L-MPZ of Myelin protein P0</b>                                 | P25189-2   | MPZ    | 2.913E-02 | 1.020E+00  | 8.289E-05 | 2.834E+00 |
| <b>Isoform LCRMP-4 of Dihydropyrimidinase-related protein 3</b>           | Q14195-2   | DPYSL3 | 1.203E-01 | 1.876E-01  | 9.339E-04 | 5.250E-01 |

|                                                                                  |        |          |           |            |           |           |
|----------------------------------------------------------------------------------|--------|----------|-----------|------------|-----------|-----------|
| <b>L-aminoadipate-semialdehyde dehydrogenase-phosphopantetheinyl transferase</b> | Q9NRN7 | AASDHPPT | 7.044E-01 | 1.063E-01  | 1.056E-04 | 1.663E+00 |
| <b>Lethal(2) giant larvae protein homolog 1</b>                                  | Q15334 | LLGL1    | 9.858E-01 | 4.357E-03  | 8.963E-03 | 7.322E-01 |
| <b>Leukotriene A-4 hydrolase</b>                                                 | P09960 | LTA4H    | 2.645E-01 | 1.913E-01  | 5.959E-04 | 8.415E-01 |
| <b>Malignant T-cell-amplified sequence 1</b>                                     | Q9ULC4 | MCTS1    | 4.645E-01 | 1.963E-01  | 8.348E-03 | 6.082E-01 |
| <b>Microtubule-associated protein RP/EB family member 1</b>                      | Q15691 | MAPRE1   | 4.444E-01 | -1.229E-01 | 2.201E-03 | 9.661E-01 |
| <b>Mitochondrial carrier homolog 2</b>                                           | Q9Y6C9 | MTCH2    | 2.263E-01 | 2.385E-01  | 2.069E-03 | 7.053E-01 |
| <b>Myelin proteolipid protein</b>                                                | P60201 | PLP1     | 3.122E-02 | 1.126E+00  | 8.629E-03 | 1.304E+00 |
| <b>Nestin</b>                                                                    | P48681 | NES      | 5.171E-01 | -1.055E-01 | 2.787E-03 | 8.322E-01 |
| <b>Neural cell adhesion molecule 1</b>                                           | P13591 | NCAM1    | 4.571E-02 | 6.019E-01  | 3.004E-03 | 1.064E+00 |
| <b>Neuroblast differentiation-associated protein AHNAK</b>                       | Q09666 | AHNAK    | 1.187E-01 | 3.325E-01  | 5.694E-04 | 8.831E-01 |
| <b>Neutral alpha-glucosidase AB</b>                                              | Q14697 | GANAB    | 1.032E-02 | 4.926E-01  | 4.523E-03 | 6.368E-01 |
| <b>Neutrophil defensin 3</b>                                                     | P59666 | DEFA3    | 2.894E-01 | 2.471E-01  | 3.034E-04 | 8.416E-01 |
| <b>Nidogen-2</b>                                                                 | Q14112 | NID2     | 4.045E-01 | -9.650E-02 | 4.093E-03 | 4.423E-01 |
| <b>Nucleolin</b>                                                                 | P19338 | NCL      | 8.495E-01 | -2.417E-02 | 2.669E-05 | 6.411E-01 |
| <b>PDZ and LIM domain protein 5</b>                                              | Q96HC4 | PDLIM5   | 9.006E-02 | 4.313E-01  | 1.485E-03 | 7.535E-01 |
| <b>PHD finger-like domain-containing protein 5A</b>                              | Q7RTV0 | PHF5A    | 5.254E-02 | 2.964E-01  | 3.699E-03 | 9.681E-01 |
| <b>Palladin</b>                                                                  | Q8WX93 | PALLD    | 1.697E-01 | 3.668E-01  | 6.061E-03 | 7.896E-01 |
| <b>Periaxin</b>                                                                  | Q9BXM0 | PRX      | 2.493E-01 | 6.065E-01  | 1.548E-03 | 2.719E+00 |
| <b>Phosphoserine aminotransferase</b>                                            | Q9Y617 | PSAT1    | 1.280E-01 | 2.366E-01  | 1.362E-03 | 5.728E-01 |
| <b>Polypyrimidine tract binding protein 1, isoform CRA_b</b>                     | A6NLN1 | PTBP1    | 6.204E-01 | 1.824E-01  | 4.115E-03 | 1.052E+00 |
| <b>Profilin</b>                                                                  | G5E9Q6 | PFN2     | 4.298E-01 | 1.646E-01  | 3.615E-04 | 8.857E-01 |
| <b>Profilin-2</b>                                                                | P35080 | PFN2     | 2.738E-01 | 2.039E-01  | 2.199E-03 | 9.422E-01 |
| <b>Prolargin</b>                                                                 | P51888 | PRELP    | 1.377E-01 | 6.757E-01  | 2.007E-03 | 1.855E+00 |
| <b>Protein BRICK1</b>                                                            | Q8WUW1 | BRK1     | 4.975E-01 | -1.106E-01 | 6.743E-03 | 6.311E-01 |
| <b>Protein CutA</b>                                                              | O60888 | CUTA     | 1.622E-01 | -2.337E-01 | 1.495E-03 | 6.517E-01 |
| <b>Protein S100-A11</b>                                                          | P31949 | S100A11  | 2.674E-01 | -6.314E-01 | 5.162E-05 | 2.076E+00 |
| <b>Protein S100-A6</b>                                                           | P06703 | S100A6   | 2.945E-01 | 3.704E-01  | 1.083E-03 | 1.421E+00 |
| <b>Protein disulfide-isomerase</b>                                               | P07237 | P4HB     | 5.051E-02 | 4.850E-01  | 1.052E-03 | 1.069E+00 |
| <b>Protein enabled homolog</b>                                                   | Q8N8S7 | ENAH     | 9.880E-01 | 1.988E-03  | 3.267E-04 | 5.757E-01 |
| <b>S-adenosylmethionine synthase isoform type-2</b>                              | P31153 | MAT2A    | 9.151E-01 | -1.110E-02 | 6.753E-03 | 4.174E-01 |

|                                                                        |        |          |           |            |           |           |
|------------------------------------------------------------------------|--------|----------|-----------|------------|-----------|-----------|
| Selenium-binding protein 1                                             | Q13228 | SELENBP1 | 7.574E-01 | 9.302E-02  | 1.173E-03 | 8.721E-01 |
| Septin 11, isoform CRA_b                                               | D6RGI3 | SEPT11   | 6.912E-01 | -6.688E-02 | 6.020E-04 | 7.254E-01 |
| Serum albumin                                                          | P02768 | ALB      | 9.739E-02 | 3.416E-01  | 8.722E-06 | 1.035E+00 |
| Spectrin beta chain, non-erythrocytic 2                                | O15020 | SPTBN2   | 7.538E-01 | 4.843E-02  | 4.674E-03 | 4.962E-01 |
| Superoxide dismutase [Mn], mitochondrial                               | P04179 | SOD2     | 2.639E-01 | 3.495E-01  | 2.307E-03 | 9.317E-01 |
| Talin-1                                                                | Q9Y490 | TLN1     | 8.608E-02 | 2.392E-01  | 7.330E-05 | 5.514E-01 |
| Transcription factor BTF3                                              | P20290 | BTF3     | 2.447E-02 | 3.289E-01  | 4.595E-03 | 5.035E-01 |
| Transgelin                                                             | Q01995 | TAGLN    | 4.405E-02 | 8.485E-01  | 6.366E-03 | 1.107E+00 |
| Transitional endoplasmic reticulum ATPase                              | P55072 | VCP      | 2.100E-01 | 1.783E-01  | 1.435E-04 | 7.130E-01 |
| Transthyretin                                                          | P02766 | TTR      | 1.251E-01 | 4.396E-01  | 4.826E-05 | 1.373E+00 |
| Tropomyosin alpha-4 chain                                              | P67936 | TPM4     | 2.513E-01 | 2.479E-01  | 4.375E-04 | 7.180E-01 |
| Vinculin                                                               | P18206 | VCL      | 1.772E-01 | 2.511E-01  | 1.228E-03 | 7.727E-01 |
| 6-phosphogluconolactonase                                              | O95336 | PGLS     | 2.665E-03 | 4.019E-01  | 2.739E-04 | 6.230E-01 |
| Moesin                                                                 | P26038 | MSN      | 8.651E-03 | 4.031E-01  | 3.413E-03 | 4.704E-01 |
| Small glutamine-rich tetratricopeptide repeat-containing protein alpha | O43765 | SGTA     | 4.064E-03 | 4.313E-01  | 1.679E-03 | 5.905E-01 |
| Alcohol dehydrogenase class-3                                          | P11766 | ADH5     | 7.339E-03 | 5.509E-01  | 2.710E-03 | 5.822E-01 |
| Annexin A5                                                             | P08758 | ANXA5    | 7.051E-03 | 6.099E-01  | 2.823E-03 | 1.117E+00 |
| ATP-dependent 6-phosphofructokinase, muscle type                       | P08237 | PFKM     | 3.140E-04 | 6.280E-01  | 1.519E-05 | 6.044E-01 |
| Heat shock protein beta-8                                              | Q9UJY1 | HSPB8    | 8.195E-03 | 7.376E-01  | 3.868E-03 | 8.926E-01 |
| Carbonic anhydrase 1                                                   | P00915 | CA1      | 9.385E-03 | 8.815E-01  | 1.850E-03 | 1.610E+00 |
| Guanine nucleotide-binding protein G(i) subunit alpha-2                | P04899 | GNAI2    | 1.104E-03 | 1.052E+00  | 3.952E-03 | 1.146E+00 |

**Supplementary Table S2:** Shows the 21 Ingenuity pathways that were found to be significantly regulated ( $-\log p\text{-value} > 1.3$ ) when comparing ALS and FTL-D-U with control subjects. The column named Molecules contains the gene names for the molecules found significantly regulated involved in each enriched pathway.

| Ingenuity Canonical Pathways | ALS                     |                                                                                                                                                                                                                    | FTLD-U                  |                                                                                                                         |
|------------------------------|-------------------------|--------------------------------------------------------------------------------------------------------------------------------------------------------------------------------------------------------------------|-------------------------|-------------------------------------------------------------------------------------------------------------------------|
|                              | $-\log(p\text{-value})$ | Molecules                                                                                                                                                                                                          | $-\log(p\text{-value})$ | Molecules                                                                                                               |
| Mitochondrial Dysfunction    | 27.50                   | HSD17B10,NDUFA4,SDHB,ATP5H,NDUFA7,UQCRH,COX5B,ACO2,NDUFA2,ATP5E,VDAC2,MAOB,NDUFA5,NDUFS1,SOD2,NDUFS6,ATP5I,ATP5F1,NDUFA8,NDUFS4,NDUFV1,COX6B1,ATP5A1,ATP5O,NDUFS5,NDUFV2,NDUFS8,CAT,UQCRC2,COX5A,CYCS,VDAC1,UQCRC1 | 21.3                    | NDUFA4,ATP5H,NDUFA7,UQCRH,PRDX5,COX5B,COX7C,NDUFA2,NDUFS5,NDUFA5,MAOB,NDUFS1,NDUFS6,HTRA2,GPX4,OGDH,ATP5I,ATP5F1,NDUFA8 |

|                                                   |       |                                                                                                                                                                            |      |                                                                                              |
|---------------------------------------------------|-------|----------------------------------------------------------------------------------------------------------------------------------------------------------------------------|------|----------------------------------------------------------------------------------------------|
| Oxidative Phosphorylation                         | 24.20 | NDUFA4,NDUFV1,COX6B1,SDHB,ATP5H,NDUFA7,UQCRH,COX5B,ATP5A1,ATP5O,NDUFA2,ATP5E,NDUFS5,NDUFS1,NDUFA5,NDUFV2,NDUFS8,UQCRC2,NDUFS6,COX5A,CYCS,UQCRC1,ATP5I,ATP5F1,NDUFS4,NDUFA8 | 16.6 | NDUFS5,NDUFA4,NDUFS1,NDUFA5,ATP5H,NDUFA7,UQCRH,COX5B,COX7C,NDUFS6,ATP5I,ATP5F1,NDUFA2,NDUFA8 |
| TCA Cycle II (Eukaryotic)                         | 7.72  | SDHB,SUCLG1,ACO2,DLD,MDH2,FH,MDH1                                                                                                                                          | 2.38 | OGDH,MDH2                                                                                    |
| Gluconeogenesis I                                 | 7.44  | GPI,ENO2,ALDOA,PGAM2,MDH2,MDH1,ALDOC                                                                                                                                       | 2.3  | ALDOA,MDH2                                                                                   |
| Glycolysis I                                      | 7.44  | GPI,TPI1,ENO2,ALDOA,PGAM2,ALDOC,PFKM                                                                                                                                       | 2.3  | ALDOA,PFKM                                                                                   |
| Aspartate Degradation II                          | 5.91  | GOT1,GOT2,MDH2,MDH1                                                                                                                                                        | 1.53 | MDH2,                                                                                        |
| NRF2-mediated Oxidative Stress Response           | 5.06  | SOD2,GSTM2,MAPK1,STIP1,VCP,CAT,HSPB8,DNAJA2,TXN,GSTO1,SOD3,GSTP1                                                                                                           | 3    | FTL,HSPB8,SOD1,MGST3,FTH1                                                                    |
| Glutaryl-CoA Degradation                          | 4.78  | HSD17B10,CA1,HADH,HSD17B8                                                                                                                                                  | 1.31 | CA1,                                                                                         |
| Xenobiotic Metabolism Signaling                   | 3.90  | ALDH1L1,MAOB,GSTM2,MAPK1,PPP2R4,CAT,GSTO1,SOD3,GSTP1,ALDH9A1,ESD,CAMK2B,ALDH7A1                                                                                            | 1.54 | FTL,MAOB,MGST3,ESD                                                                           |
| Superoxide Radicals Degradation                   | 3.85  | SOD2,CAT,SOD3                                                                                                                                                              | 1.48 | SOD1,                                                                                        |
| Noradrenaline and Adrenaline Degradation          | 3.76  | HSD17B10,ADH5,MAOB,ALDH9A1,ALDH7A1                                                                                                                                         | 1.95 | ADH5,MAOB                                                                                    |
| Formaldehyde Oxidation II (Glutathione-dependent) | 3.71  | ADH5,ESD                                                                                                                                                                   | 4.75 | ADH5,ESD                                                                                     |
| Sucrose Degradation V (Mammalian)                 | 3.68  | TPI1,ALDOA,ALDOC                                                                                                                                                           | 1.43 | ALDOA,                                                                                       |
| Pentose Phosphate Pathway (Oxidative Branch)      | 2.94  | PGD,PGLS                                                                                                                                                                   | 1.78 | PGLS,                                                                                        |
| Serotonin Degradation                             | 2.62  | HSD17B10,ADH5,MAOB,ALDH9A1,ALDH7A1                                                                                                                                         | 1.49 | ADH5,MAOB                                                                                    |
| Aldosterone Signaling in Epithelial Cells         | 2.26  | PLCD1,CRYAB,MAPK1,HSP E1,HSPB8,HSPA4L,HSPA12A                                                                                                                              | 3.33 | PLCD1,PLCD3,HSPE1,HSPB8,HSPA2                                                                |
| Pentose Phosphate Pathway                         | 2.94  | PGD,PGLS                                                                                                                                                                   | 1.78 | PGLS,                                                                                        |
| p70S6K Signaling                                  | 1.59  | PLCD1,YWHAH,MAPK1,PPP2R4,BCAP31                                                                                                                                            | 1.85 | PLCD1,PLCD3,BCAP31                                                                           |
| Protein Ubiquitination Pathway                    | 1.57  | UCHL1,CRYAB,HSPE1,HSPB8,PSMA1,SKP1,HSPA4L,HSPA12A                                                                                                                          | 2.34 | PSMA7,HSPE1,HSPB8,SKP1,HSPA2                                                                 |
| UVA-Induced MAPK Signaling                        | 1.46  | PLCD1,MAPK1,CYCS,PARP1                                                                                                                                                     | 2.21 | PLCD1,PLCD3,PARP1                                                                            |
| Antiproliferative Role of TOB in T Cell Signaling | 1.30  | MAPK1,SKP1                                                                                                                                                                 | 2.27 | PABPC1,SKP1                                                                                  |

**Supplementary Table S3:** Shows the ideal conditions for the western blot employed to analyze each target under study. Antibody dilutions (v-v) for the primary and secondary antibodies, acrylamide percentages for the pre-casted gels and blocking and antibody dilution solution.

| Western blot | Primary antibody dilution | Secondary antibody dilution | Acrylamide % | Blocking and Antibody dilution solution. |
|--------------|---------------------------|-----------------------------|--------------|------------------------------------------|
| LGALS3       | 1-1000                    | anti-mouse 1-5000           | 4-15%        | 5 % milk                                 |
| TTR          | 1-1000                    | anti-sheep 1-3000           | 4-15%        | 5 % milk                                 |
| SELENBP1     | 1-1000                    | anti-rabbit 1-5000          | 10-20%       | 5 % milk                                 |
| Pin-1        | 1-1000                    | anti-rabbit 1-5000          | 10-20%       | 5 % BSA                                  |
| S100A11      | 1-100                     | anti-rabbit 1-5000          | 10-20%       | 5 % milk                                 |
| S100A6       | 1-1000                    | anti-rabbit 1-5000          | 10-20%       | 5 % BSA                                  |
| CACYBP       | 1-1000                    | anti-rabbit 1-5000          | 10-20%       | 5 % BSA                                  |
| ROCK 2       | 1-10000                   | anti-rabbit 1-5000          | 10-20%       | 5 % milk                                 |
| PHB1         | 1-1000                    | anti-rabbit 1-5000          | 10-20%       | 5 % BSA                                  |
| PHB2         | 1-1000                    | anti-rabbit 1-5000          | 10-20%       | 5 % BSA                                  |
| AKT          | 1-1000                    | anti-rabbit 1-5000          | 10-20%       | 5 % BSA                                  |
| pAKT         | Jan-00                    | anti-rabbit 1-5000          | 10-20%       | 5 % BSA                                  |
| FAK          | 1-1000                    | anti-rabbit 1-5000          | 10-20%       | 5 % BSA                                  |
| pFAK         | 1-1000                    | anti-rabbit 1-5000          | 10-20%       | 5 % BSA                                  |
| ERK          | 1-1000                    | anti-rabbit 1-5000          | 10-20%       | 5 % BSA                                  |
| pERK         | Jan-00                    | anti-rabbit 1-5000          | 10-20%       | 5 % BSA                                  |
| MEK          | 1-1000                    | anti-rabbit 1-5000          | 10-20%       | 5 % BSA                                  |
| pMEK         | 1-1000                    | anti-rabbit 1-5000          | 10-20%       | 5 % BSA                                  |
